# Supplementary material
Source: ML conference proceedings conference paper supplement (https://openreview.net/forum?id=3WnTBadc-J)

BR CC CP GBNC-S

Difference in Subset 0/1 Loss

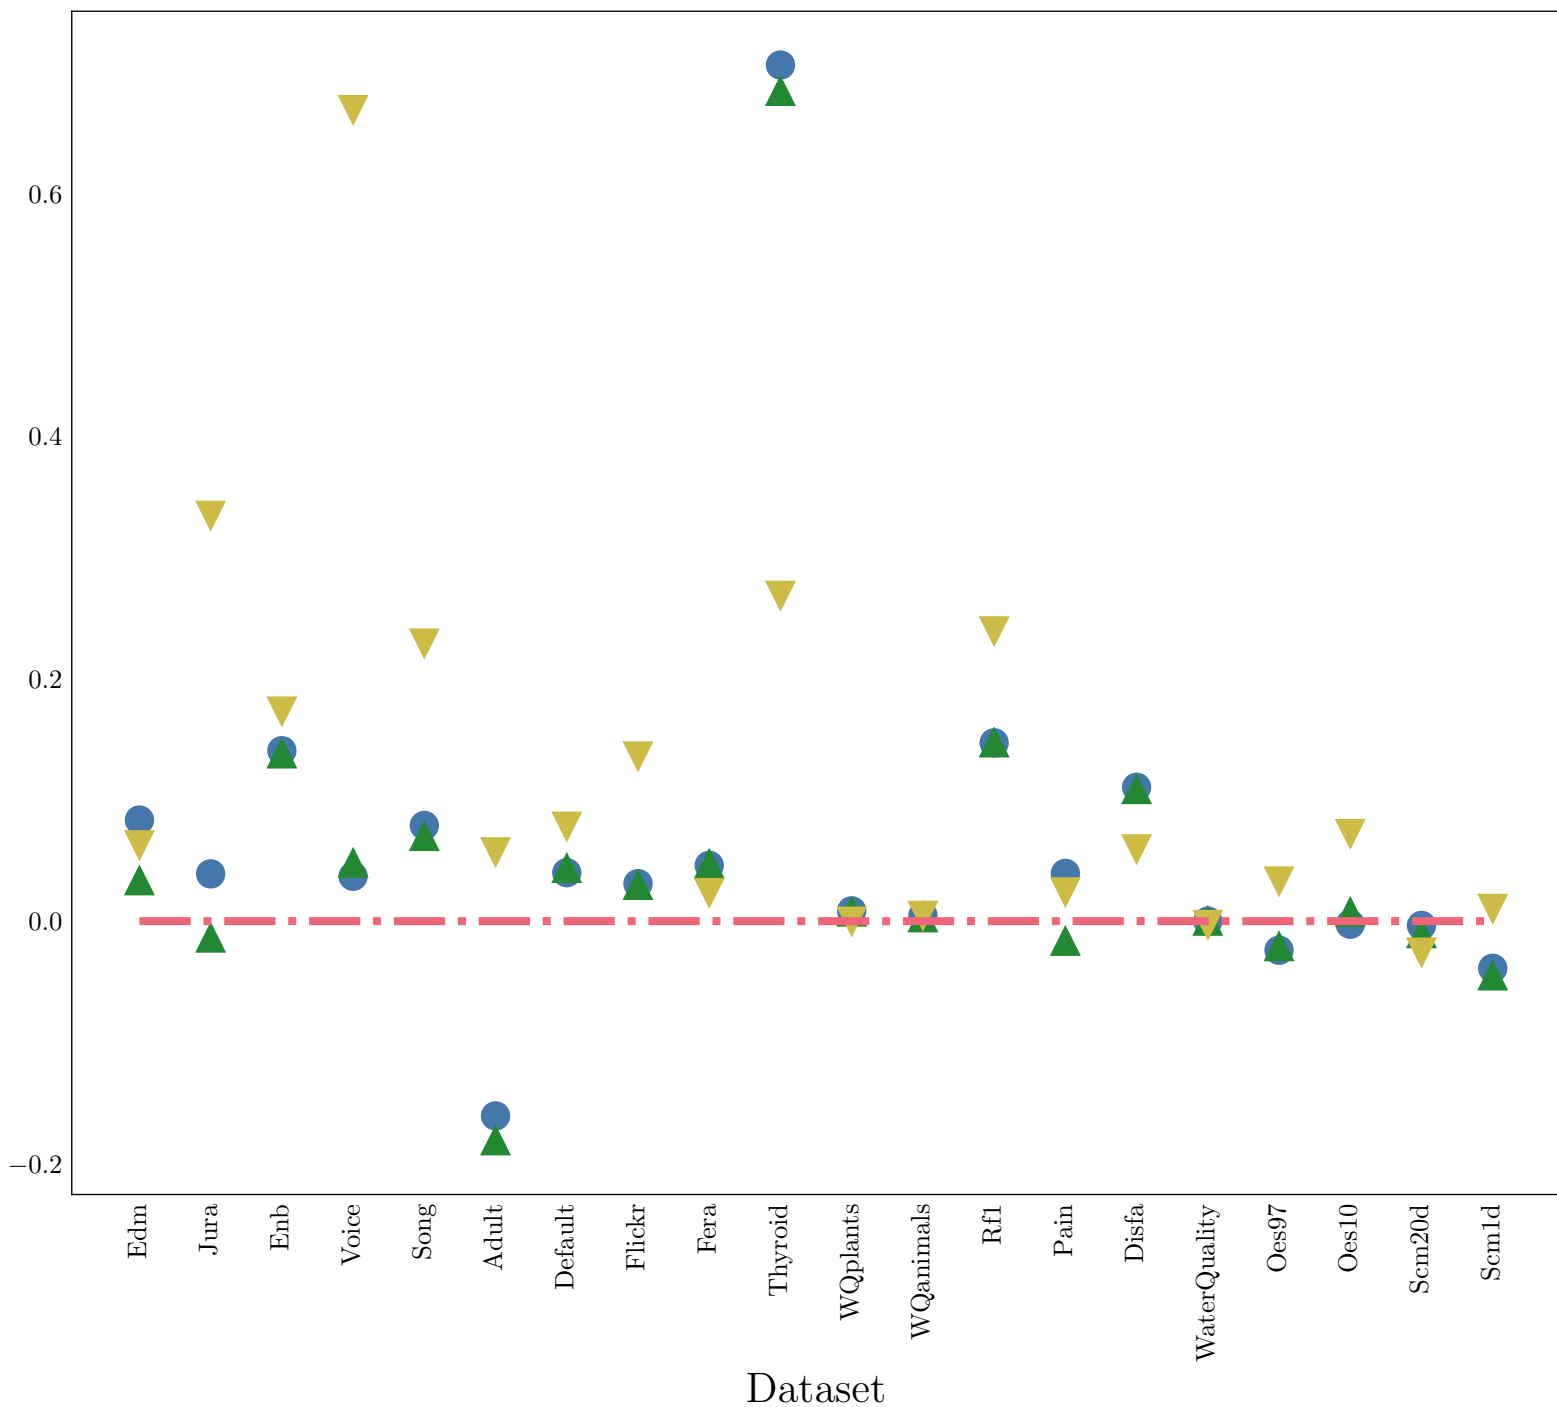

Supplement: supplementary_material [file attachment]

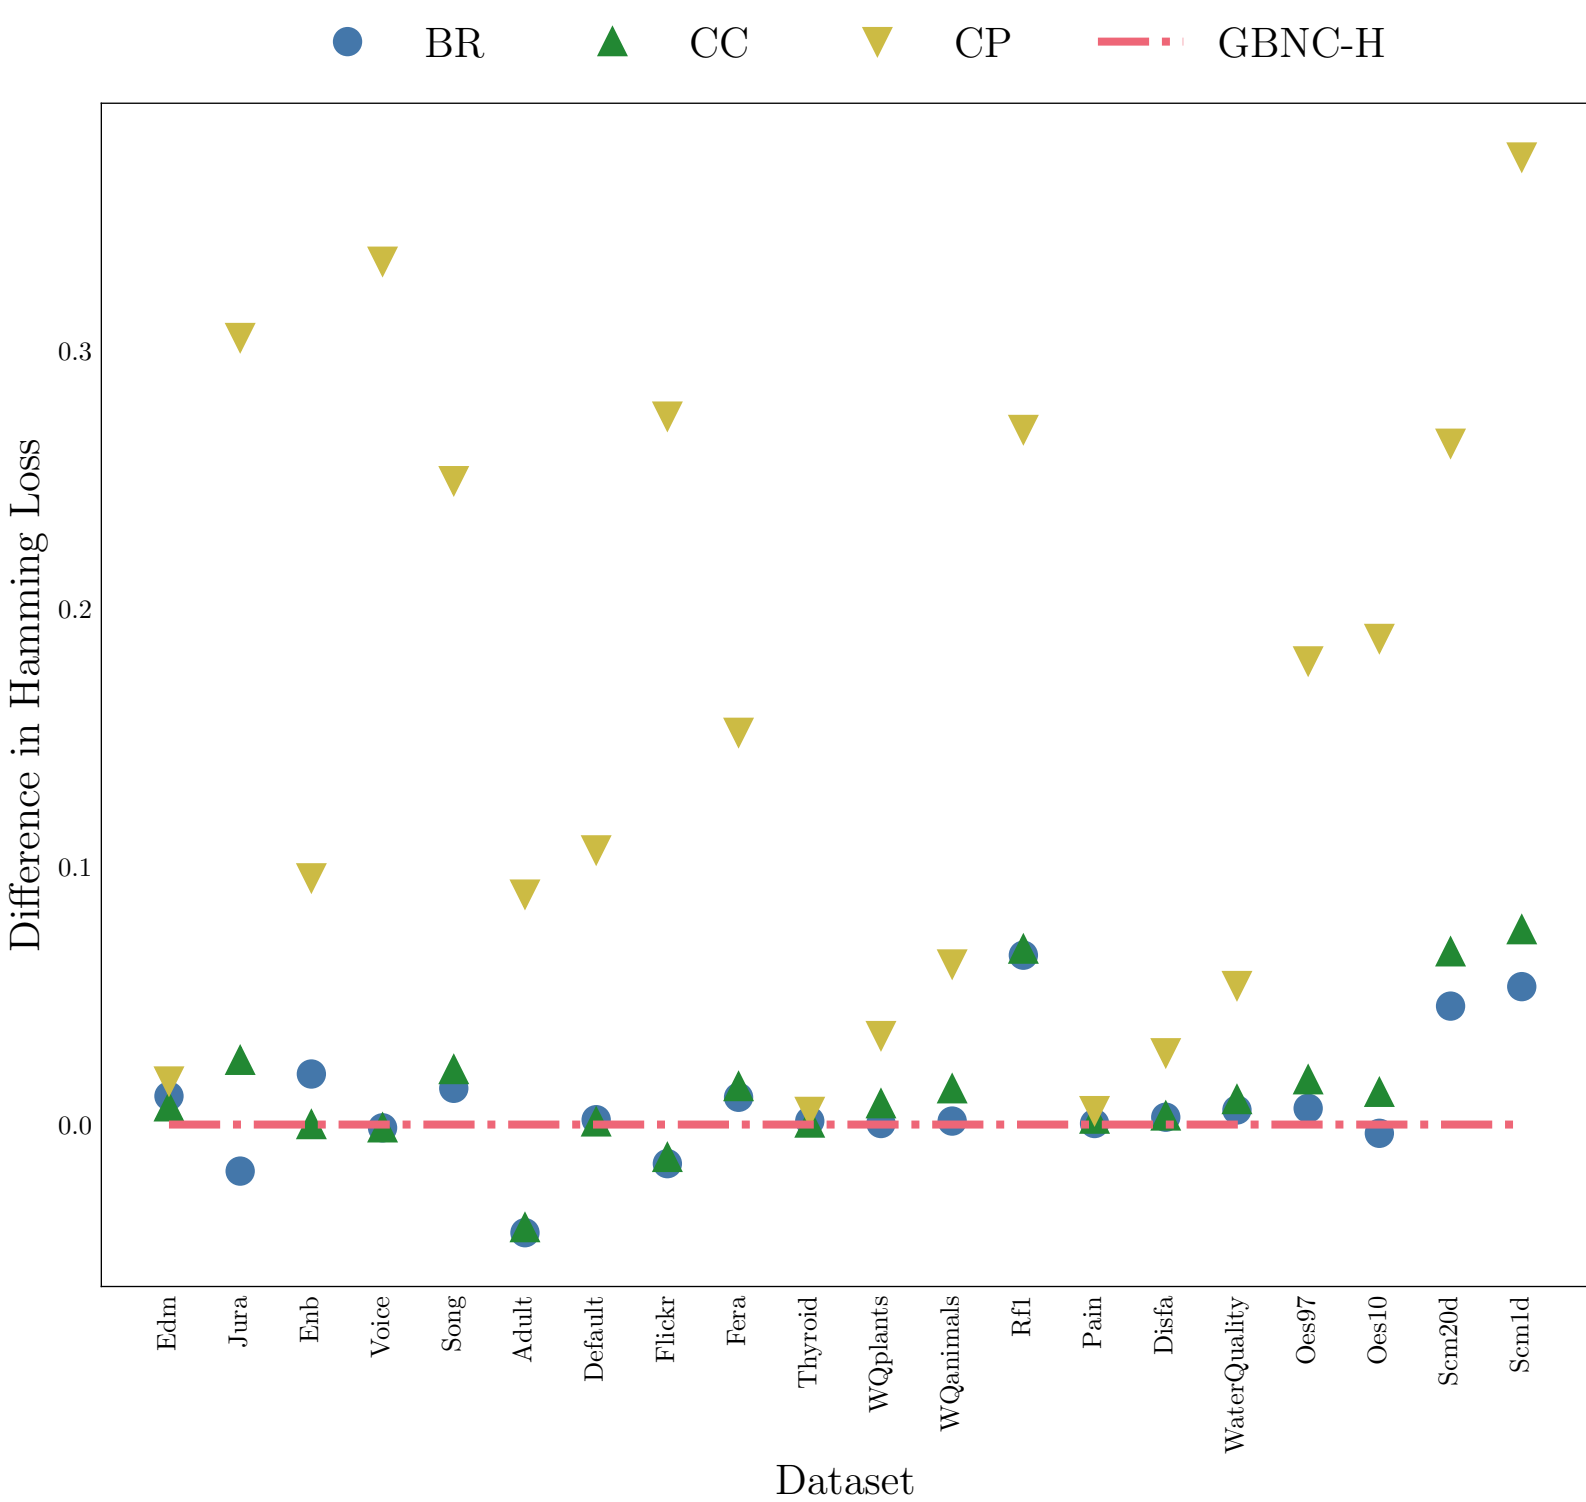

Supplement: supplementary_material [file attachment]

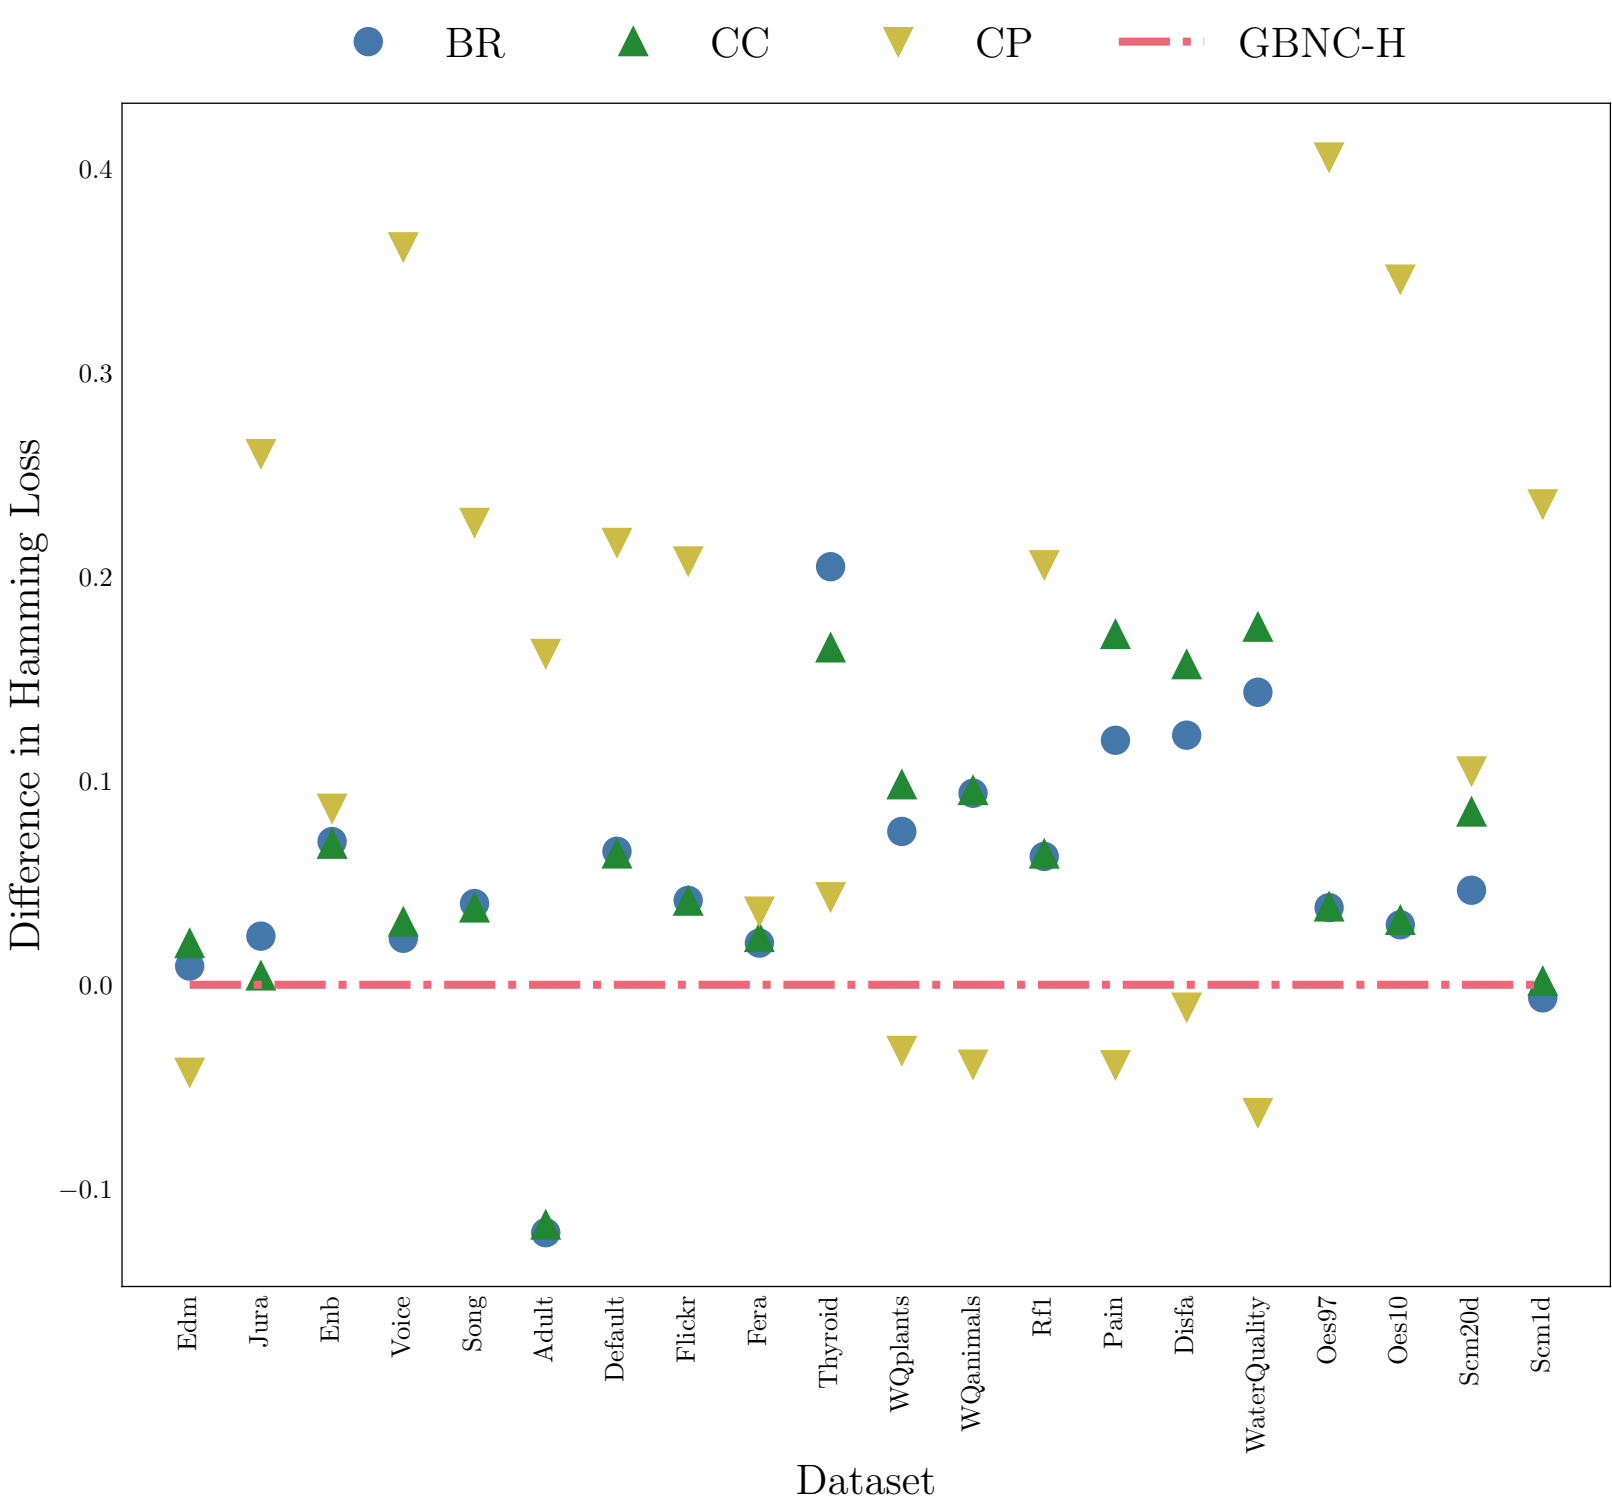

Supplement: supplementary_material [file attachment]

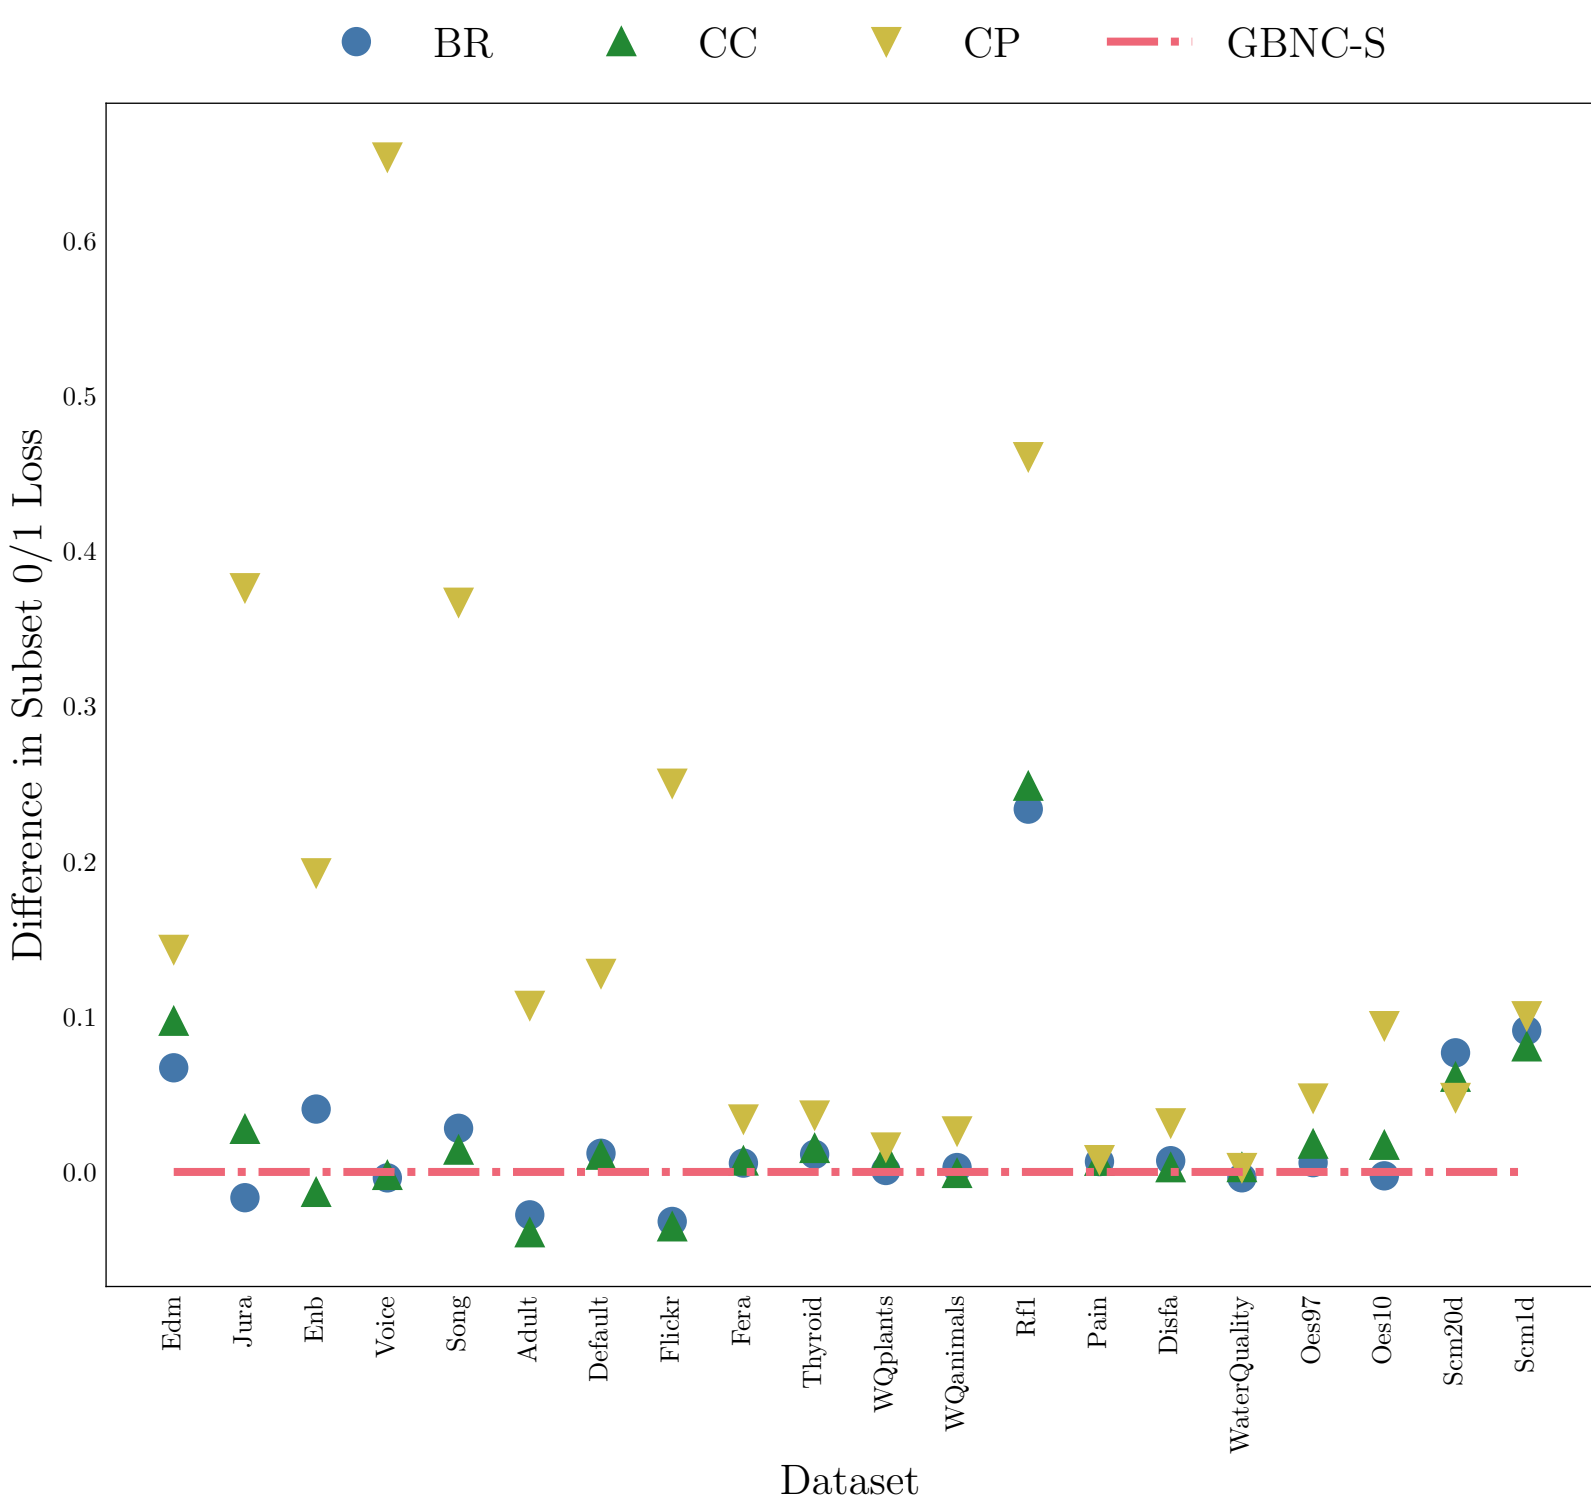

Supplement: supplementary_material [file attachment]
